# Supplementary material for: Dose-response associations between accelerometry measured physical activity and sedentary time and all cause mortality: systematic review and harmonised meta-analysis
Source: PubMed Central journal article supplement — BMJ. 2019 Aug 21;366:l4570. doi: 10.1136/bmj.l4570 (PMC6699591; doi:10.1136/bmj.l4570), 2019-08-21
Supplement: ekeu048737.ww1.pdf [file ekeu048737.ww1.pdf]

## SUPPLEMENTARY TABLES AND FIGURES

### Dose-response associations between accelerometry measured physical activity and sedentary time with all-cause mortality: a systematic review and harmonised meta-analysis

List of authors:

Ulf Ekelund<sup>1,2</sup>, Jakob Tarp<sup>1</sup>, Jostein Steene-Johannessen<sup>1</sup>, Børge H Hansen<sup>1</sup>, Barbara Jefferis<sup>3</sup>, Morten W Fagerland<sup>1,4</sup>, Peter Whincup<sup>5</sup>, Keith M Diaz<sup>6</sup>, Steven P Hooker<sup>7</sup>, Ariel Chernofsky<sup>8</sup>, Martin G Larson<sup>8</sup>, Nicole Spartano<sup>9</sup>, Ramachandran S Vasan<sup>10</sup>, Ing-Mari Dohrn<sup>11</sup>, Maria Hagströmer<sup>12,13</sup>, Charlotte Edwardson<sup>14,15</sup>, Thomas Yates<sup>14,15</sup>, Eric Shiroma<sup>16</sup>, Sigmund A Anderssen<sup>1</sup>, I-Min Lee<sup>17,18</sup>

Author Affiliations:

Ulf Ekelund (0000-0003-2115-926) Professor, <sup>1</sup>Department of Sports Medicine, Norwegian School of Sport Sciences, Oslo, Norway, and <sup>2</sup>Department of Chronic Diseases and Ageing, Norwegian Institute of Public Health, Oslo, Norway, Jakob Tarp, Post Doc, <sup>1</sup>Department of Sports Medicine, Norwegian School of Sport Sciences, Oslo, Norway, Jostein Steene-Johannessen Associate Professor, <sup>1</sup>Department of Sports Medicine, Norwegian School of Sport Sciences, Oslo, Norway, Børge H Hansen Associate Professor, <sup>1</sup>Department of Sports Medicine, Norwegian School of Sport Sciences, Oslo, Norway, Barbara Jefferis, Senior lecturer, <sup>3</sup>Department of Primary Care & Population Health, Institute of Epidemiology & Health Care, University College London. London, UK, Morten W Fagerland, Statistician, <sup>1</sup>Department of Sports Medicine, Norwegian School of Sport Sciences, Oslo, Norway, and <sup>4</sup>Oslo Centre for Biostatistics and Epidemiology, Research Support Services, Oslo University Hospital, Oslo, Norway, Peter Whincup Professor, <sup>5</sup>Population Health Research Institute, St George's, University of London, London, UK, Keith M Diaz Assistant Professor, <sup>6</sup>Center for Behavioral Cardiovascular Health, Department of Medicine, Columbia University Medical Center, New York, USA, Steven P Hooker Professor, <sup>7</sup>College of Health and Human Services, San Diego State University, San Diego, USA, Ariel Chernofsky Doctoral Student, <sup>8</sup>Department of Biostatistics, Boston University School of Public Health, Boston, USA, Martin G Larson Professor, <sup>8</sup>Department of Biostatistics, Boston University School of Public Health, Boston, USA, Nicole Spartano Assistant Professor, <sup>9</sup>Department of Endocrinology, Diabetes, Nutrition and Weight Management, Boston University School of Medicine, Boston, MA, USA, Ramachandran S Vasan Professor, <sup>10</sup>Departments of Medicine and Epidemiology, Boston University School of Medicine and Boston University School of Public Health, Boston, MA, USA Ing-Mari Dohrn Post Doc, <sup>11</sup>Department of Neurobiology, Care Sciences and Society, Aging Research Center, Karolinska Institutet, Stockholm, Sweden, Maria Hagströmer, Associate Professor <sup>12</sup>Department of Neurobiology, Care Sciences and Society, Division of Physiotherapy, Karolinska Institutet, Stockholm, Sweden and <sup>13</sup>Function area Occupational Therapy and Physiotherapy, Allied Health Professionals, Karolinska University Hospital, Stockholm, Sweden, Charlotte Edwardson Senior Lecturer, <sup>14</sup>Diabetes Research Centre, College of Life Sciences, Thomas Yates, Leicester, UK and <sup>15</sup>NIHR Leicester Biomedical Research Centre, University of Leicester and University Hospitals of Leicester NHS Trust, Leicester, UK, Thomas Yates Professor, <sup>14</sup>Diabetes Research Centre, College of Life Sciences, Thomas Yates, Leicester, UK and <sup>15</sup>NIHR Leicester Biomedical Research Centre, University of Leicester and University Hospitals of Leicester NHS Trust, Leicester, UK, Eric Shiroma Scientist, <sup>16</sup>Neuro-epidemiology Section, National Institute of Ageing, National Institutes of Health, Bethesda, USA, Sigmund A Anderssen Professor, <sup>1</sup>Department of Sports Medicine, Norwegian School of Sport Sciences, Oslo, Norway, I-Min Lee Professor, <sup>17</sup>Department of Medicine, Brigham and Women's Hospital and Harvard Medical School, Boston, USA and <sup>18</sup>Department of Epidemiology, Harvard T.H. Chan School of Public Health, Boston, USA

| <b>Supplementary Table 1.</b> Descriptive characteristics of participants. Data are mean (SD) unless otherwise stated. |                        |                          |                         |                           |                        |                          |                         |
|------------------------------------------------------------------------------------------------------------------------|------------------------|--------------------------|-------------------------|---------------------------|------------------------|--------------------------|-------------------------|
|                                                                                                                        | <b>WAT2D</b>           |                          | <b>REGARDS</b>          |                           | <b>ABC</b>             |                          | <b>BRHS</b>             |
|                                                                                                                        | <b>Men<br/>(N=411)</b> | <b>Women<br/>(N=243)</b> | <b>Men<br/>(N=3580)</b> | <b>Women<br/>(N=4282)</b> | <b>Men<br/>(N=371)</b> | <b>Women<br/>(N=463)</b> | <b>Men<br/>(N=1412)</b> |
| Age (y)                                                                                                                | 64.4 (7.0)             | 62.3 (8.8)               | 69.9 (8.4)              | 68.2 (8.7)                | 53.1 (10.5)            | 52.6 (10.1)              | 78.4 (4.6)              |
| Height (m)                                                                                                             | 1.74 (0.07)            | 1.60 (0.06)              | 1.78 (0.07)             | 1.63 (0.07)               | 1.79 (0.06)            | 1.66 (0.06)              | 1.71 (0.07)             |
| Weight (kg)                                                                                                            | 93.6 (16.2)            | 87.0 (17.0)              | 89.6 (16.5)             | 77.1 (17.8)               | 83.3 (10.6)            | 69.8 (11.7)              | 79.7 (12.6)             |
| BMI                                                                                                                    | 30.8 (4.7)             | 34.0 (5.8)               | 28.3 (4.7)              | 28.9 (6.3)                | 25.9 (3.0)             | 25.4 (3.9)               | 27.1 (3.8)              |
| Normal-weight (%)                                                                                                      | 7.3                    | 3.7                      | 23.7                    | 29.0                      | 41.4                   | 55.2                     | 29.0                    |
| Over-weight (%)                                                                                                        | 40.4                   | 21.4                     | 47.1                    | 33.9                      | 49.7                   | 32.3                     | 51.2                    |
| Obese (%)                                                                                                              | 52.3                   | 74.9                     | 29.2                    | 37.1                      | 8.8                    | 12.5                     | 19.8                    |
| Wear time (min/d)                                                                                                      | 852 (216)              | 843 (209)                | 850 (282)               | 846 (268)                 | 909 (211)              | 881 (213)                | 844 (246)               |
| Mean Counts<br>(counts/min)                                                                                            | 318 (147)              | 258 (116)                | 103 (78)                | 84 (64)                   | 358 (89)               | 341 (211)                | 186 (80)                |
| Sedentary (min/d)                                                                                                      | 537 (91)               | 523 (93)                 | 690 (84)                | 694 (83)                  | 524 (104)              | 507 (94)                 | 610 (83)                |
| LPA (min/d)                                                                                                            | 281.7 (75.9)           | 294.9 (71.8)             | 149 (70)                | 140 (67)                  | 334 (99)               | 342 (87)                 | 217 (77)                |
| Low LPA (min/d)                                                                                                        | 202 (47)               | 215 (50)                 | 123 (53)                | 122 (55)                  | 245 (63)               | 254 (62)                 | 175 (55)                |
| High LPA (min/d)                                                                                                       | 79 (36)                | 70 (36)                  | 26 (18)                 | 18 (16)                   | 88 (52)                | 87 (40)                  | 41 (30)                 |
| MVPA (min/d)                                                                                                           | 32.0 (26.6)            | 19.1 (17.3)              | 9.8 (14.9)              | 6.6 (11.6)                | 35.5 (30.0)            | 30.5 (30.6)              | 15.6 (17.6)             |
| MVPA bouts (min/d)                                                                                                     | 12.8 (18.5)            | 5.6 (9.8)                | 5.2 (11.7)              | 3.9 (9.4)                 | 13.1 (22.2)            | 12.7 (26.3)              | 9.0 (15.2)              |
| VPA (min/d)                                                                                                            | 0.7 (2.6)              | 0.4 (2.3)                | 1.2 (5.1)               | 0.9 (4.3)                 | 2.6 (11.7)             | 1.8 (13.2)               | 0.5 (2.8)               |

| <b>Supplementary Table 1 continued.</b> Descriptive characteristics of participants. Data are mean (SD) unless otherwise stated. |                            |                         |                           |                         |                           |                         |                           |
|----------------------------------------------------------------------------------------------------------------------------------|----------------------------|-------------------------|---------------------------|-------------------------|---------------------------|-------------------------|---------------------------|
|                                                                                                                                  | <b>WHS</b>                 | <b>FHS</b>              |                           | <b>NHANES</b>           |                           | <b>NNPAS</b>            |                           |
|                                                                                                                                  | <b>Women<br/>(N=16738)</b> | <b>Men<br/>(N=1225)</b> | <b>Women<br/>(N=1396)</b> | <b>Men<br/>(N=1977)</b> | <b>Women<br/>(N=2001)</b> | <b>Men<br/>(N=1243)</b> | <b>Women<br/>(N=1371)</b> |
| Age (y)                                                                                                                          | 72.0 (5.7)                 | 64.7 (9.6)              | 64.6 (9.1)                | 57.1 (12.5)             | 58.3 (12.2)               | 57.2 (10.8)             | 55.8 (11.0)               |
| Height (m)                                                                                                                       | 1.64 (0.1)                 | 1.75 (0.07)             | 1.61 (0.06)               | 1.76 (0.08)             | 1.62 (0.07)               | 179.3 (6.5)             | 166.5 (6.0)               |
| Weight (kg)                                                                                                                      | 70.7 (14.2)                | 88.7 (15.7)             | 71.2 (15.8)               | 88.8 (18.8)             | 75.4 (18.6)               | 84.8 (12.4)             | 69.6 (12.0)               |
| BMI                                                                                                                              | 26.2 (5.0)                 | 29.0 (4.6)              | 27.6 (5.8)                | 28.6 (5.5)              | 28.7 (6.7)                | 26.3 (3.4)              | 25.1 (4.2)                |
| Normal-weight (%)                                                                                                                | 46.3                       | 16.9                    | 35.7                      | 22.3                    | 25.5                      | 28.5                    | 56.4                      |
| Over-weight (%)                                                                                                                  | 34.2                       | 47.7                    | 35.9                      | 44.7                    | 31.1                      | 48.9                    | 32.2                      |
| Obese (%)                                                                                                                        | 19.5                       | 35.4                    | 28.4                      | 33.0                    | 34.4                      | 12.6                    | 11.4                      |
| Wear time (min/d)                                                                                                                | 900 (260)                  | 884 (288)               | 875 (290)                 | 864 (232)               | 850 (231)                 | 910 (247)               | 905 (239)                 |
| Mean Counts<br>(counts/min)                                                                                                      | 198 (95)                   | 148 (144)               | 129 (106)                 | 309 (162)               | 259 (123)                 | 329.5 (150.0)           | 324.5 (135.5)             |
| Time Sedentary<br>(min/d)                                                                                                        | 592 (95)                   | 675 (89)                | 679 (82)                  | 512 (127)               | 502 (110)                 | 576.8 (87.9)            | 547.4 (85.0)              |
| LPA (min/d)                                                                                                                      | 285 (79)                   | 180 (72)                | 171 (64)                  | 319 (102)               | 326 (91)                  | 275 (80)                | 303 (77)                  |
| Low LPA (min/d)                                                                                                                  | 221 (56)                   | 140 (52)                | 142 (50)                  | 235 (66)                | 257 (65)                  | 200 (50)                | 230 (57)                  |
| High LPA (min/d)                                                                                                                 | 63 (36)                    | 39 (26)                 | 28 (19)                   | 84 (48)                 | 69 (40)                   | 77 (40)                 | 74 (37)                   |
| MVPA (min/d)                                                                                                                     | 14.8 (16.8)                | 16.9 (23.3)             | 13.9 (19.7)               | 25.6 (24.7)             | 15.5 (16.6)               | 36.9 (26.4)             | 33.5 (23.5)               |
| MVPA bouts (min/d)                                                                                                               | 7.8 (13.7)                 | 8.7 (19.7)              | 8.5 (16.9)                | 6.2 (13.6)              | 4.8 (10.1)                | 17.9 (21.6)             | 18.7 (19.1)               |
| VPA (min/d)                                                                                                                      | 0.3 (2.1)                  | 2.6 (10.9)              | 2.7 (.8)                  | 1.0 (3.7)               | 0.5 (2.2)                 | 2.8 (7.7)               | 2.1 (5.8)                 |

LPA, Light intensity Physical Activity; MVPA, Moderate-and-Vigorous intensity Physical Activity; MVPA bouts, time (min/d) in bouts of 10 minutes; VPA, Vigorous intensity Physical Activity

| <b>Supplementary Table 2.</b> Quality assessment of studies included in the meta-analysis. |                           |                  |                                   |                |                      |                   |                      |                 |
|--------------------------------------------------------------------------------------------|---------------------------|------------------|-----------------------------------|----------------|----------------------|-------------------|----------------------|-----------------|
| <b>Study</b>                                                                               | <b>Selection</b>          |                  |                                   |                | <b>Comparability</b> | <b>Outcome</b>    |                      |                 |
|                                                                                            | <b>Representativeness</b> | <b>Selection</b> | <b>Ascertainment<br/>Exposure</b> | <b>Outcome</b> |                      | <b>Assessment</b> | <b>Follow<br/>Up</b> | <b>Adequacy</b> |
| WAT2D<br>(Bakrania et al, 2017)                                                            | D                         | A*               | A*                                | A*             | A* B                 | B*                | A*                   | A*              |
| REGARDS<br>(Diaz et al, 2017)                                                              | C                         | A*               | A*                                | A*             | A* A*                | B*                | A*                   | A*              |
| ABC<br>(Dohrn et al, 2017)                                                                 | B*                        | A*               | A*                                | A*             | A* B                 | B*                | A*                   | A*              |
| BRHS<br>(Jefferis et al, 2018)                                                             | C                         | A*               | A*                                | A*             | A* A*                | B*                | A*                   | A*              |
| WHS<br>(Lee et al, 2018)                                                                   | C                         | A*               | A*                                | A*             | A* A*                | B*                | A*                   | A*              |
| NHANES<br>(Matthews et al, 2016)                                                           | A*                        | A*               | A*                                | A*             | A* A*                | B*                | A*                   | A*              |
| Framingham<br>(Murabito et al, 2015)                                                       | B*                        | A*               | A*                                | A*             | A* A*                | B*                | A*                   | A*              |
| NPASS<br>(Hansen et al, 2012))                                                             | A*                        | A*               | A*                                | A*             | A* A*                | B*                | A*                   | A*              |

\*Denotes the coding contributing to summary quality assessment. For full details of the coding system (A to D) see [http://www.ohri.ca/programs/clinical\\_epidemiology/nos\\_manual.pdf](http://www.ohri.ca/programs/clinical_epidemiology/nos_manual.pdf)

| <b>Supplementary table 3.</b> Median of exposure variables stratified by quartiles according to Model B. |              |                |            |             |            |            |               |              |                                   |
|----------------------------------------------------------------------------------------------------------|--------------|----------------|------------|-------------|------------|------------|---------------|--------------|-----------------------------------|
|                                                                                                          | <b>WAT2D</b> | <b>REGARDS</b> | <b>ABC</b> | <b>BRHS</b> | <b>WHS</b> | <b>FHS</b> | <b>NHANES</b> | <b>NNPAS</b> | <b>Median of medians* (range)</b> |
| <b>Total Physical Activity (CPM)</b>                                                                     |              |                |            |             |            |            |               |              |                                   |
| Quartile 1                                                                                               | 155          | 30             | 196        | 72          | 99         | 53         | 124           | 180          | 139.5 (53-196)                    |
| Quartile 2                                                                                               | 237          | 58             | 291        | 134         | 156        | 96         | 210           | 274          | 223.5 (134-291)                   |
| Quartile 3                                                                                               | 318          | 94             | 371        | 199         | 212        | 139        | 291           | 351          | 304.5 (199-371)                   |
| Quartile 4                                                                                               | 464          | 165            | 522        | 315         | 304        | 222        | 435           | 479          | 449.5 (304-522)                   |
| <b>Sedentary (min/d)</b>                                                                                 |              |                |            |             |            |            |               |              |                                   |
| Quartile 1                                                                                               | 433          | 597            | 405        | 519         | 484        | 579        | 371           | 463          | 448 (371-519)                     |
| Quartile 2                                                                                               | 506          | 668            | 483        | 588         | 563        | 651        | 469           | 534          | 520 (469-588)                     |
| Quartile 3                                                                                               | 565          | 719            | 542        | 639         | 621        | 709        | 545           | 591          | 578 (542-639)                     |
| Quartile 4                                                                                               | 637          | 786            | 624        | 705         | 696        | 772        | 637           | 663          | 650 (624-705)                     |
| <b>LPA (min/d)</b>                                                                                       |              |                |            |             |            |            |               |              |                                   |
| Quartile 1                                                                                               | 197          | 66             | 231        | 132         | 196        | 101        | 210           | 202          | 199.5 (132-231)                   |
| Quartile 2                                                                                               | 252          | 118            | 301        | 191         | 257        | 149        | 290           | 261          | 258.5 (191-301)                   |
| Quartile 3                                                                                               | 298          | 160            | 363        | 237         | 307        | 190        | 352           | 310          | 308.5 (237-363)                   |
| Quartile 4                                                                                               | 363          | 224            | 444        | 305         | 376        | 250        | 437           | 383          | 379.5 (305-444)                   |
| <b>Low LPA (min/d)</b>                                                                                   |              |                |            |             |            |            |               |              |                                   |
| Quartile 1                                                                                               | 153          | 60             | 182        | 113         | 159        | 85         | 173           | 157          | 158 (113-182)                     |
| Quartile 2                                                                                               | 187          | 103            | 228        | 156         | 202        | 122        | 226           | 197          | 199.5 (156-228)                   |
| Quartile 3                                                                                               | 219          | 137            | 269        | 191         | 236        | 154        | 268           | 228          | 232 (191-269)                     |
| Quartile 4                                                                                               | 262          | 184            | 323        | 236         | 285        | 199        | 326           | 279          | 282 (236-326)                     |
| <b>High LPA (min/d)</b>                                                                                  |              |                |            |             |            |            |               |              |                                   |
| Quartile 1                                                                                               | 30           | 3              | 43         | 11          | 26         | 10         | 24            | 36           | 28 (11-43)                        |
| Quartile 2                                                                                               | 57           | 12             | 69         | 27          | 48         | 23         | 53            | 59           | 55 (27-69)                        |
| Quartile 3                                                                                               | 80           | 23             | 94         | 44          | 69         | 36         | 80            | 81           | 80 (44-94)                        |
| Quartile 4                                                                                               | 121          | 44             | 132        | 75          | 104        | 59         | 127           | 117          | 119 (75-132)                      |
| <b>MVPA (min/d)</b>                                                                                      |              |                |            |             |            |            |               |              |                                   |
| Quartile 1                                                                                               | 4            | 0              | 10         | 1           | 0          | 1          | 2             | 9            | 1.5 (0-10)                        |
| Quartile 2                                                                                               | 14           | 1              | 22         | 5           | 5          | 5          | 7             | 24           | 6 (1-24)                          |
| Quartile 3                                                                                               | 26           | 5              | 36         | 15          | 14         | 14         | 17            | 38           | 16 (5-38)                         |
| Quartile 4                                                                                               | 56           | 20             | 61         | 36          | 33         | 33         | 40            | 63           | 38 (20-63)                        |

LPA, Light intensity Physical Activity; MVPA, Moderate-and-Vigorous intensity Physical Activity; VPA, Vigorous intensity Physical Activity

\*Median of the medians calculated from six studies using the Actigraph accelerometer except for MVPA

**Supplementary table 4.** Meta-analysis for the associations between bouted moderate and vigorous intensity physical activity (MVPA) and vigorous intensity physical activity (VPA) with all-cause mortality (**Model B** adjusted for sex, age, BMI and socio-economic position; [N=36383, 2149 deaths]; **Model C** additionally adjusted for covariates listed in Table 1, [N=35932, 2047 deaths]). Data are Hazard Ratios and 95% Confidence Intervals by Cox regression.

|                           | <b>Model B</b>             |                                       |                                       |                                       | <b>Model C</b>             |                                       |                                       |                                       |
|---------------------------|----------------------------|---------------------------------------|---------------------------------------|---------------------------------------|----------------------------|---------------------------------------|---------------------------------------|---------------------------------------|
|                           | <b>Quartile 1</b>          | <b>Quartile 2</b>                     | <b>Quartile 3</b>                     | <b>Quartile 4</b>                     | <b>Quartile 1</b>          | <b>Quartile 2</b>                     | <b>Quartile 3</b>                     | <b>Quartile 4</b>                     |
| MVPA<br>bouted<br>(min/d) | 1 (Ref)<br>(N=18963; 1585) | 0.72<br>(0.62; 0.83)<br>(N=5712; 222) | 0.68<br>(0.56; 0.83)<br>(N=5863; 182) | 0.60<br>(0.48; 0.77)<br>(N=5845; 160) | 1 (Ref)<br>(N=18692; 1499) | 0.78<br>(0.67; 0.91)<br>(N=5684; 212) | 0.77<br>(0.65; 0.90)<br>(N=5809; 179) | 0.66<br>(0.54; 0.82)<br>(N=5783; 157) |
| VPA<br>(min/d)            | 1 (Ref)<br>(N=28826; 1921) | 1.01<br>(0.80; 1.27)<br>(N=2487; 109) | 0.66<br>(0.49; 0.89)<br>(N=2556; 67)  | 0.62<br>(0.45; 0.84)<br>(N=2514; 52)  | 1 (Ref)<br>(N=28439; 1824) | 1.09<br>(0.88; 1.35)<br>(N=2461; 106) | 0.73<br>(0.55; 0.96)<br>(N=2534; 66)  | 0.70<br>(0.51; 0.97)<br>(N=2498; 51)  |

MVPA bouted, time (min/d) in bouts of 10 minutes

**Supplementary Table 5.** Dose-response associations (Hazard Ratios and 95% Confidence Intervals) for total physical activity, time spent in light intensity physical activity, low light intensity physical activity, high light intensity physical activity, moderate and vigorous intensity physical activity and sedentary time with all-cause mortality. Data are adjusted for age, sex, body mass index, socio-economic status and wear time. The exposure reference is set as the median of the medians in the reference group (Supplementary Table 3).

| <b>Total PA (CPM)</b> | <b>HR (95% CI)</b>   | <b>LPA (min/d)</b> | <b>HR (95% CI)</b>   | <b>Low LPA (min/d)</b> | <b>HR (95% CI)</b>   | <b>High LPA (min/d)</b> | <b>HR (95% CI)</b>   | <b>MVPA (min/d)</b> | <b>HR (95% CI)</b>   | <b>Sedentary (h/d)</b> | <b>HR (95% CI)</b>   |
|-----------------------|----------------------|--------------------|----------------------|------------------------|----------------------|-------------------------|----------------------|---------------------|----------------------|------------------------|----------------------|
| <b>75</b>             | 1.88<br>(1.68, 2.12) | <b>150</b>         | 1.48<br>(1.34, 1.63) | <b>100</b>             | 1.76<br>(1.41, 2.20) | <b>10</b>               | 1.62<br>(1.45, 1.80) | <b>0</b>            | Reference            | <b>6</b>               | 0.89<br>(0.74, 1.07) |
| <b>100</b>            | 1.48<br>(1.37, 1.59) | <b>175</b>         | 1.22<br>(1.16, 1.28) | <b>125</b>             | 1.38<br>(1.22, 1.56) | <b>20</b>               | 1.24<br>(1.18, 1.30) | <b>2</b>            | 0.89<br>(0.85, 0.92) | <b>6.5</b>             | 0.93<br>(0.82, 1.05) |
| <b>125</b>            | 1.16<br>(1.13, 1.19) | <b>200</b>         | Reference            | <b>150</b>             | 1.08<br>(1.05, 1.11) | <b>28</b>               | Reference            | <b>4</b>            | 0.79<br>(0.73, 0.85) | <b>7</b>               | 0.96<br>(0.91, 1.02) |
| <b>140</b>            | Reference            | <b>225</b>         | 0.82<br>(0.78, 0.86) | <b>158</b>             | Reference            | <b>30</b>               | 0.95<br>(0.94, 0.96) | <b>6</b>            | 0.70<br>(0.62, 0.79) | <b>7.5</b>             | Reference            |
| <b>175</b>            | 0.71<br>(0.67, 0.76) | <b>250</b>         | 0.68<br>(0.62, 0.75) | <b>175</b>             | 0.85<br>(0.79, 0.90) | <b>40</b>               | 0.73<br>(0.68, 0.78) | <b>8</b>            | 0.62<br>(0.53, 0.73) | <b>8</b>               | 1.04<br>(0.98, 1.10) |
| <b>200</b>            | 0.56<br>(0.50, 0.62) | <b>275</b>         | 0.58<br>(0.51, 0.66) | <b>200</b>             | 0.67<br>(0.57, 0.78) | <b>50</b>               | 0.56<br>(0.49, 0.64) | <b>10</b>           | 0.56<br>(0.45, 0.68) | <b>8.5</b>             | 1.08<br>(0.96, 1.22) |
| <b>225</b>            | 0.46<br>(0.39, 0.53) | <b>300</b>         | 0.52<br>(0.45, 0.59) | <b>225</b>             | 0.56<br>(0.46, 0.68) | <b>60</b>               | 0.46<br>(0.38, 0.55) | <b>12</b>           | 0.50<br>(0.40, 0.64) | <b>9</b>               | 1.15<br>(0.98, 1.36) |
| <b>250</b>            | 0.39<br>(0.33, 0.53) | <b>325</b>         | 0.49<br>(0.43, 0.57) | <b>250</b>             | 0.51<br>(0.43, 0.62) | <b>70</b>               | 0.41<br>(0.33, 0.51) | <b>14</b>           | 0.46<br>(0.35, 0.61) | <b>9.5</b>             | 1.28<br>(1.06, 1.54) |
| <b>275</b>            | 0.36<br>(0.29, 0.43) | <b>350</b>         | 0.49<br>(0.40, 0.59) | <b>275</b>             | 0.49<br>(0.41, 0.59) | <b>80</b>               | 0.40<br>(0.31, 0.52) | <b>16</b>           | 0.43<br>(0.32, 0.59) | <b>10</b>              | 1.48<br>(1.22, 1.79) |
| <b>300</b>            | 0.34<br>(0.27, 0.43) | <b>375</b>         | 0.48<br>(0.38, 0.63) | <b>300</b>             | 0.47<br>(0.38, 0.59) | <b>90</b>               | 0.41<br>(0.30, 0.56) | <b>18</b>           | 0.41<br>(0.30, 0.58) | <b>10.5</b>            | 1.75<br>(1.44, 2.13) |
| <b>325</b>            | 0.35<br>(0.26, 0.45) | <b>400</b>         | 0.48<br>(0.34, 0.68) | <b>325</b>             | 0.45<br>(0.34, 0.60) | <b>100</b>              | 0.42<br>(0.29, 0.61) | <b>20</b>           | 0.40<br>(0.28, 0.58) | <b>11</b>              | 2.07<br>(1.68, 2.56) |
| <b>350</b>            | 0.35<br>(0.26, 0.48) | <b>425</b>         | 0.48<br>(0.31, 0.74) |                        |                      | <b>110</b>              | 0.43<br>(0.27, 0.68) | <b>22</b>           | 0.40<br>(0.27, 0.58) | <b>11.5</b>            | 2.46<br>(1.94, 3.12) |
| <b>375</b>            | 0.35<br>(0.24, 0.51) | <b>450</b>         | 0.48<br>(0.29, 0.80) |                        |                      | <b>120</b>              | 0.45<br>(0.24, 0.83) | <b>24</b>           | 0.39<br>(0.26, 0.59) | <b>12</b>              | 2.92<br>(2.24, 3.82) |

**Supplementary Table 6.** Sensitivity analyses excluding deaths (N=544) within the first two years of follow-up for the associations between overall physical activity, sedentary time and different intensities of physical activity stratified by quartiles with all-cause mortality (N=35729, 1605 deaths). Data (Hazard Ratios, 95% Confidence Intervals) from Cox regression models are adjusted for sex, age, BMI, socio-economic position and wear time and sedentary time and moderate-and-vigorous intensity physical activity are mutually adjusted. Data are derived from 7 studies due to only one death in the ABC study.

|                   | <b>Quartile 1</b>        | <b>Quartile 2</b>                  | <b>Quartile 3</b>                  | <b>Quartile 4</b>                  |
|-------------------|--------------------------|------------------------------------|------------------------------------|------------------------------------|
| Total PA (CPM)    | 1 (Ref)<br>(N=8792; 883) | 0.47 (0.40; 0.54)<br>(N=8949; 342) | 0.33 (0.26; 0.41)<br>(N=8948, 219) | 0.29 (0.23; 0.35)<br>(N=9010; 161) |
| LPA (min/d)       | 1 (Ref)<br>(N=8758; 791) | 0.60 (0.53; 0.68)<br>(N=8954; 390) | 0.45 (0.38; 0.52)<br>(N=8985; 249) | 0.38 (0.28; 0.51)<br>(N=9032; 175) |
| MVPA (min/d)      | 1 (Ref)<br>(N=8741; 842) | 0.66 (0.54; 0.80)<br>(N=9020; 354) | 0.51 (0.43; 0.66)<br>(N=8976; 266) | 0.53 (0.43; 0.66)<br>(N=8987; 183) |
| Sedentary (min/d) | 1 (Ref)<br>(N=8962; 248) | 1.19 (0.92; 1.54)<br>(N=8969; 320) | 1.57 (1.13; 2.20)<br>(N=8934; 425) | 2.32 (1.59; 3.38)<br>(N=8845; 612) |

CPM, Counts Per Minute; LPA, Light intensity Physical Activity; MVPA, Moderate-and-Vigorous intensity Physical Activity;



**Supplementary Table 7.** Sensitivity analyses excluding two studies (FHS and REGARDS) in which physical activity was assessed by a different monitor (N=25900; 1482 deaths) and excluding two studies (FHS and NNPAS) in which data on mortality have not been previously published (N=31487; 1941) for the associations between total physical activity (CPM) stratified by quartiles with all-cause mortality. Data (Hazard Ratios, 95% Confidence Intervals) from Cox regression models are adjusted for sex, age, BMI, and socio-economic position.

|                             | Quartile 1                | Quartile 2                         | Quartile 3                         | Quartile 4                         |
|-----------------------------|---------------------------|------------------------------------|------------------------------------|------------------------------------|
| Total PA (CPM) <sup>1</sup> | 1 (Ref)<br>(N=6476; 809)  | 0.48 (0.41; 0.55)<br>(N=6484; 326) | 0.38 (0.26; 0.55)<br>(N=6474; 188) | 0.31 (0.25; 0.38)<br>(N=6466; 159) |
| Total PA (CPM) <sup>2</sup> | 1 (Ref)<br>(N=7870; 1056) | 0.49 (0.44; 0.55)<br>(N=7879; 448) | 0.36 (0.25; 0.50)<br>(N=7869; 241) | 0.28 (0.23; 0.34)<br>(N=7860; 196) |

CPM, Counts Per Minute

<sup>1</sup>excluding FHS and REGARDS

<sup>2</sup>excluding FHS and NNPAS

**Supplementary Table 8.** Knot locations for the 25<sup>th</sup>, 50<sup>th</sup>, and 75<sup>th</sup> percentiles for the dose-response associations between physical activity and sedentary time presented in **Figure 2 a-f**.

|                   | 25 <sup>th</sup> percentile | 50 <sup>th</sup> percentile | 75 <sup>th</sup> percentile | Goodness of fit (R <sup>2</sup> ) |
|-------------------|-----------------------------|-----------------------------|-----------------------------|-----------------------------------|
| Total PA (CPM)    | 168                         | 256                         | 335                         | 89%                               |
| LPA (min/d)       | 221                         | 294                         | 358                         | 92%                               |
| Low LPA (min/d)   | 178                         | 223                         | 265                         | 84%                               |
| High LPA (min/d)  | 40                          | 64                          | 88                          | 76%                               |
| MVPA (min/d)      | 5                           | 14                          | 33                          | 63%                               |
| Sedentary (hrs/d) | 8.1                         | 9.2                         | 10.5                        | 86%                               |

CPM, Counts Per Minute; LPA, Light intensity Physical Activity; MVPA, Moderate-and-Vigorous intensity Physical Activity; VPA, Vigorous intensity Physical Activity

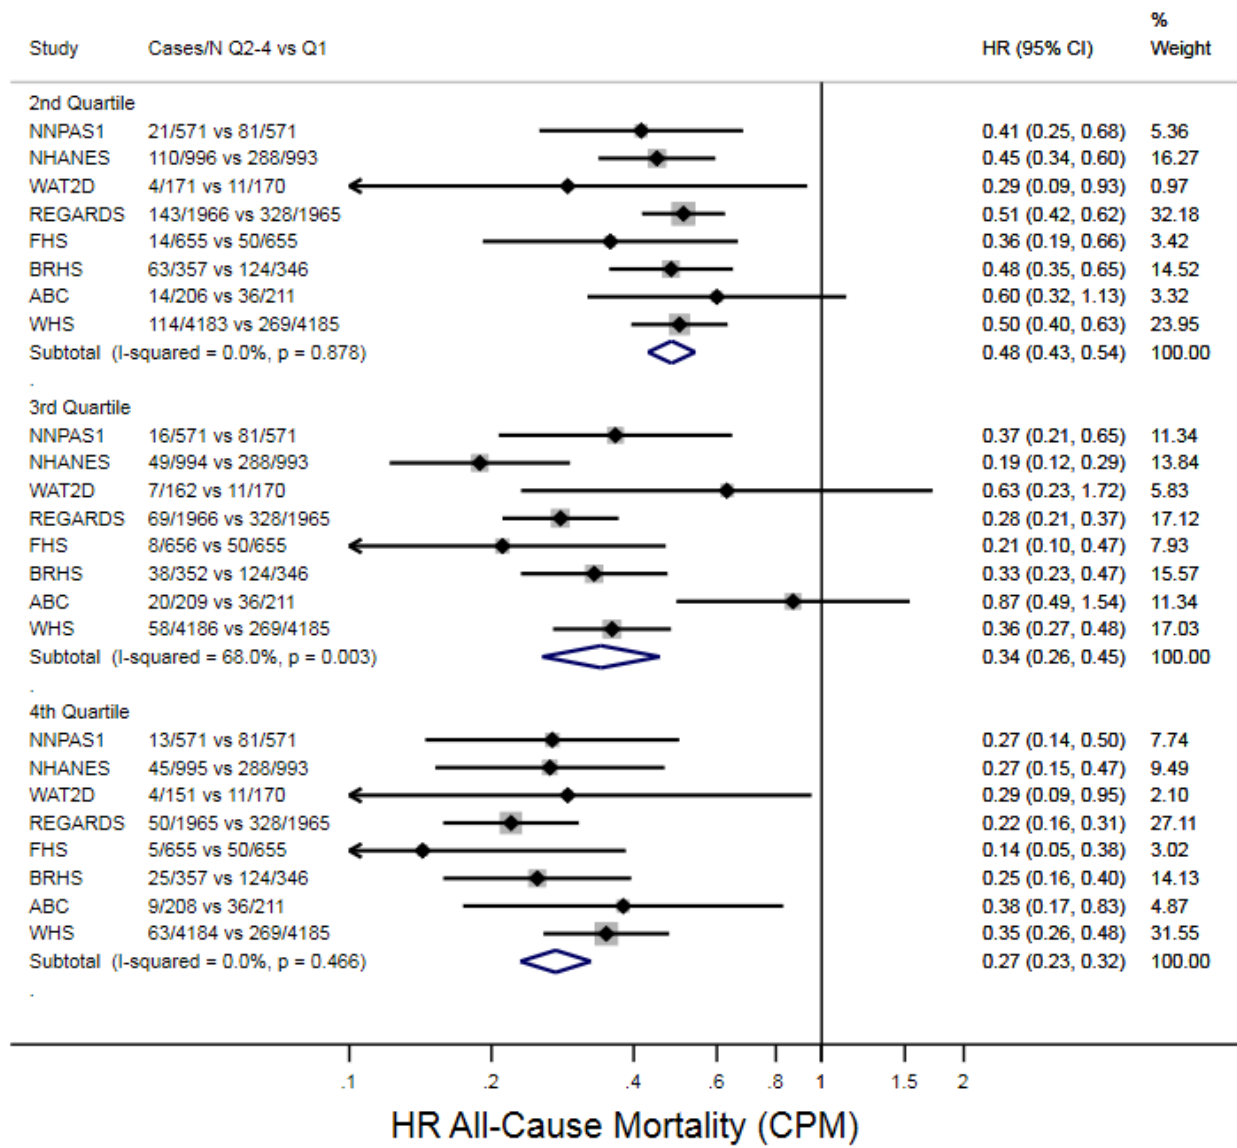

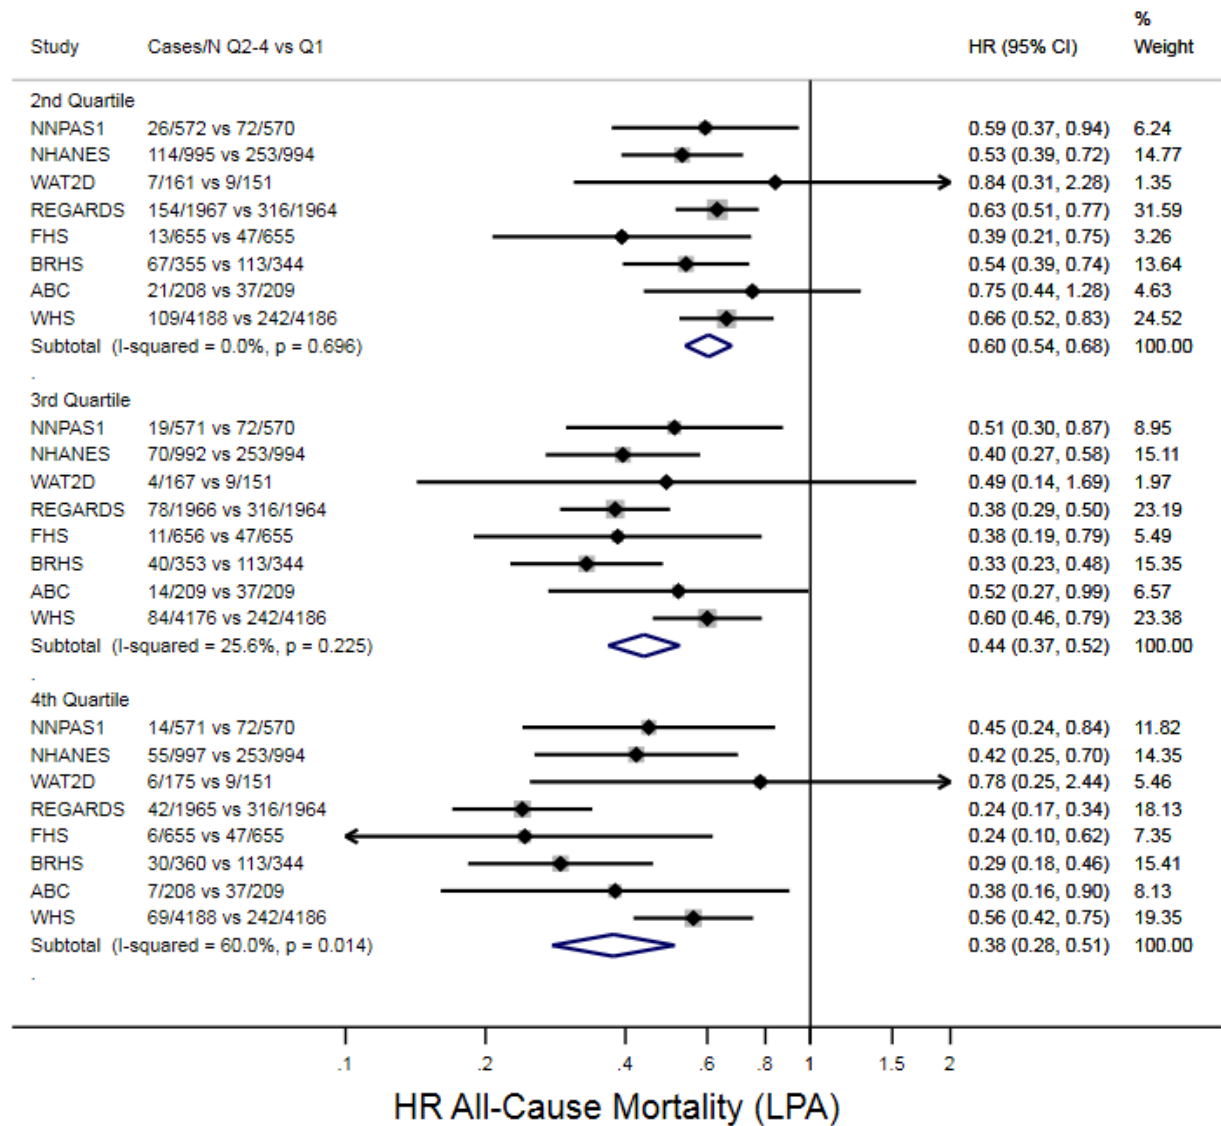

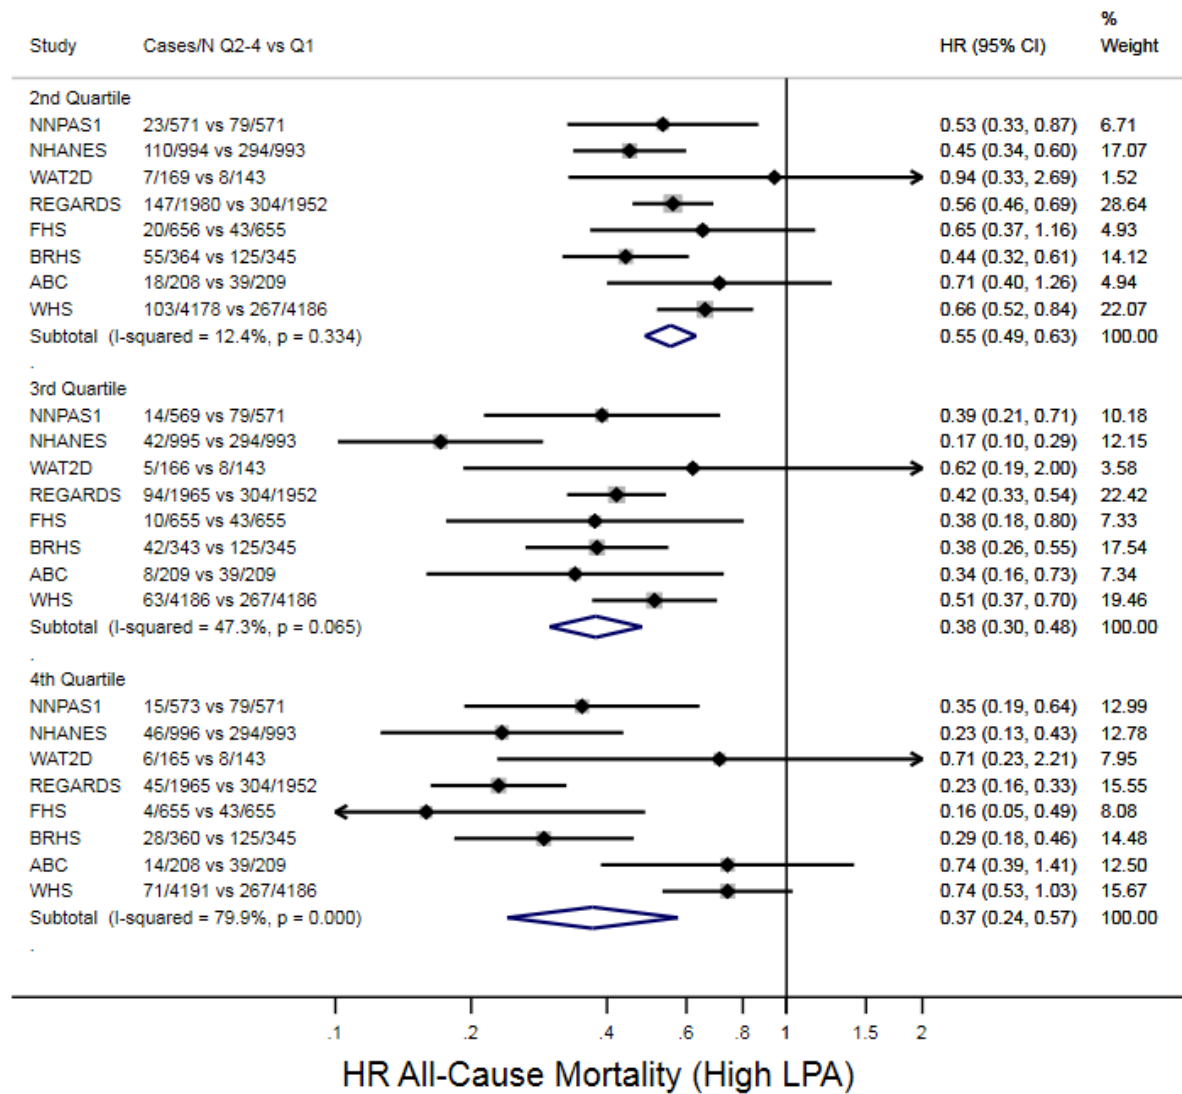

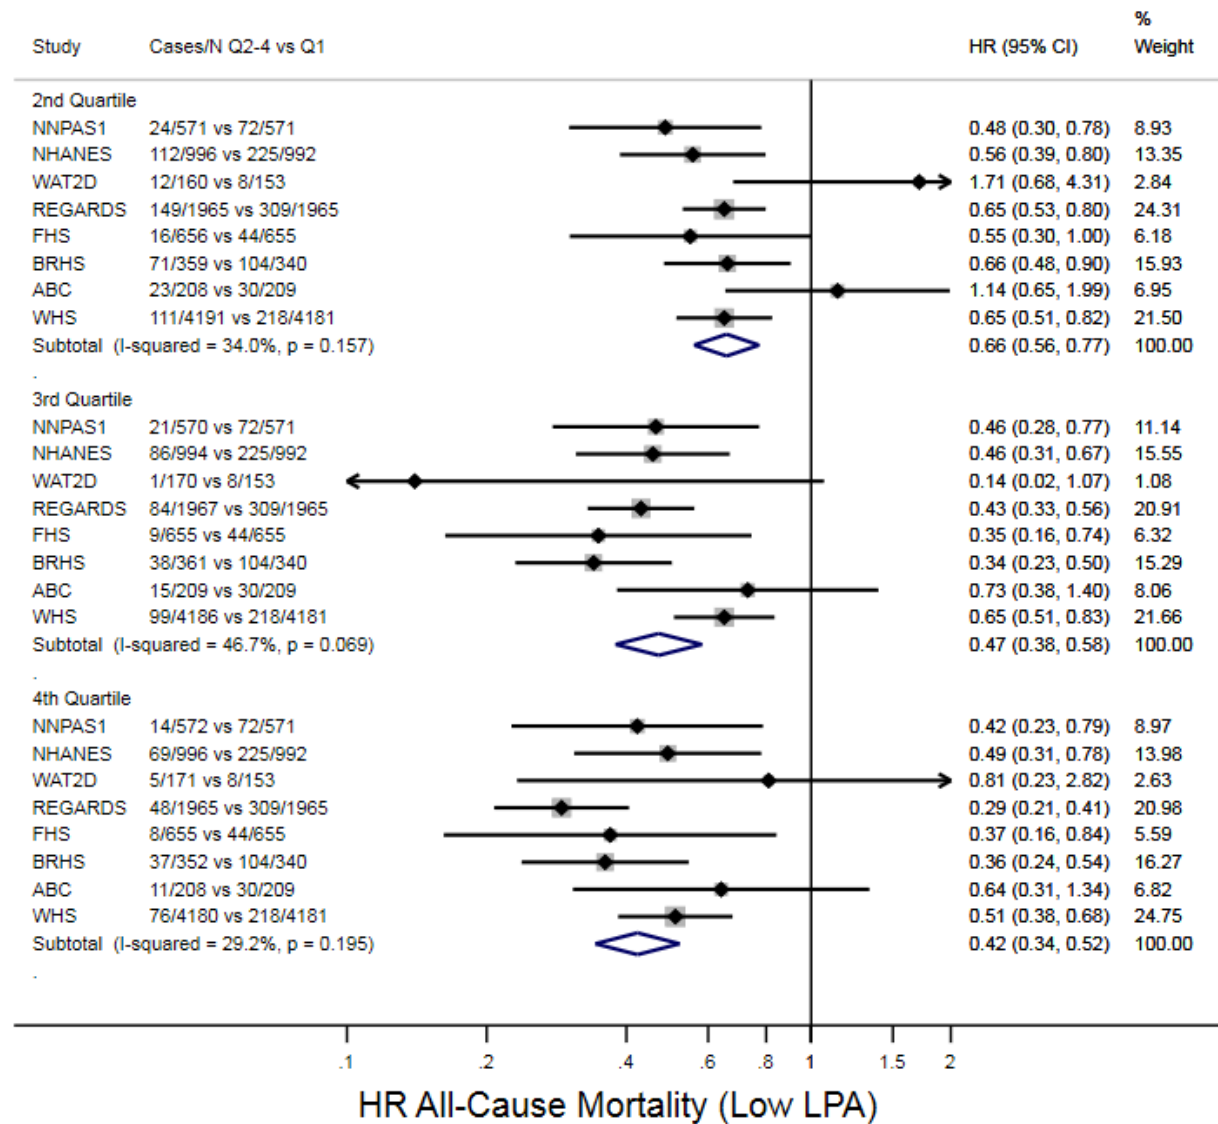

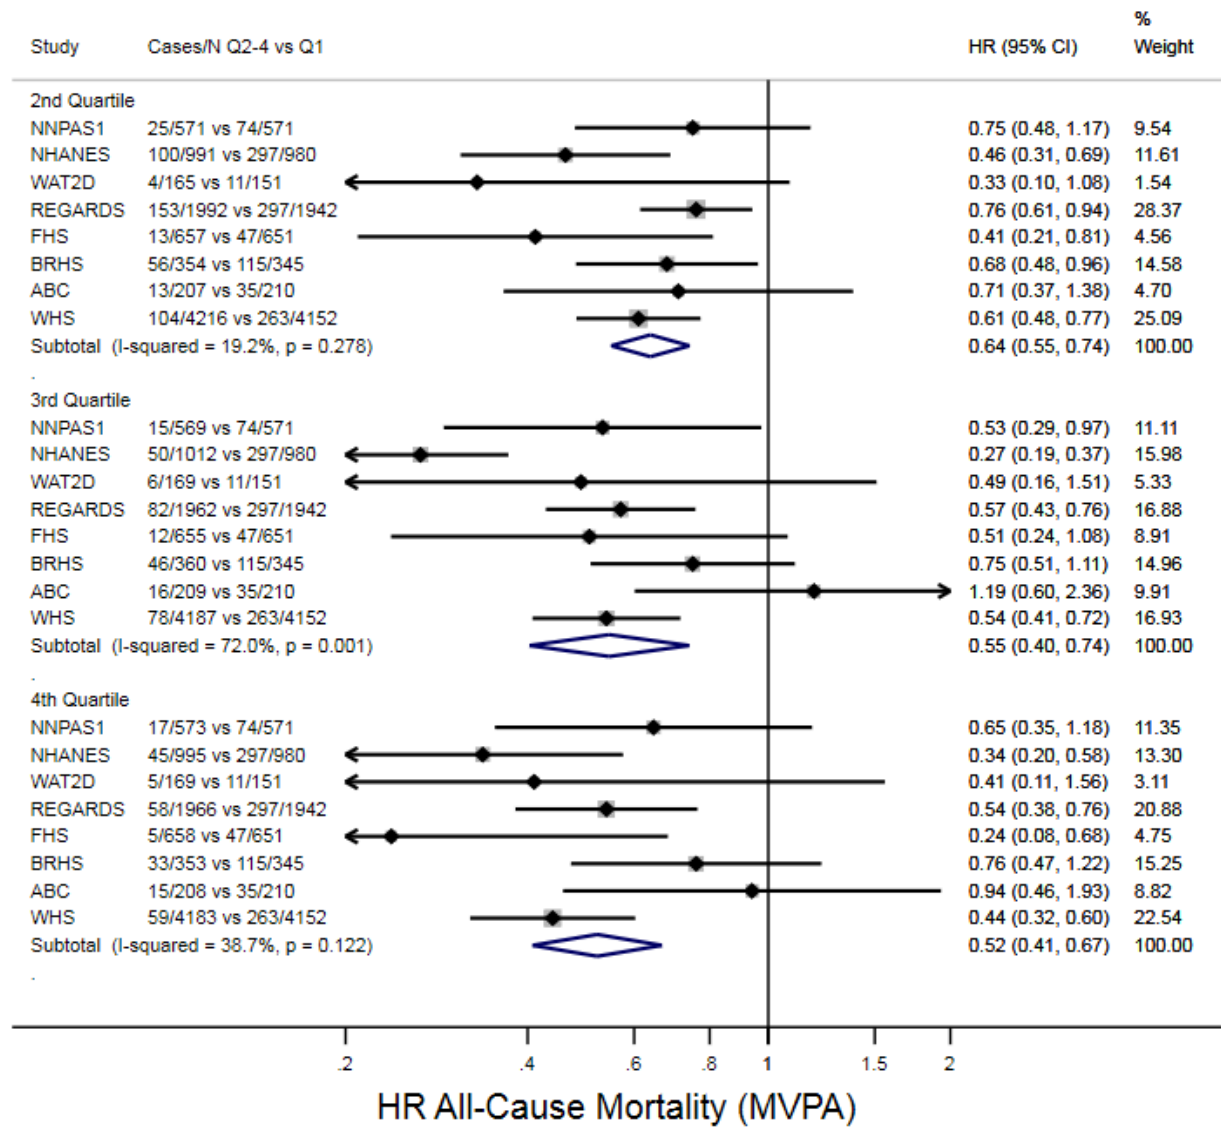

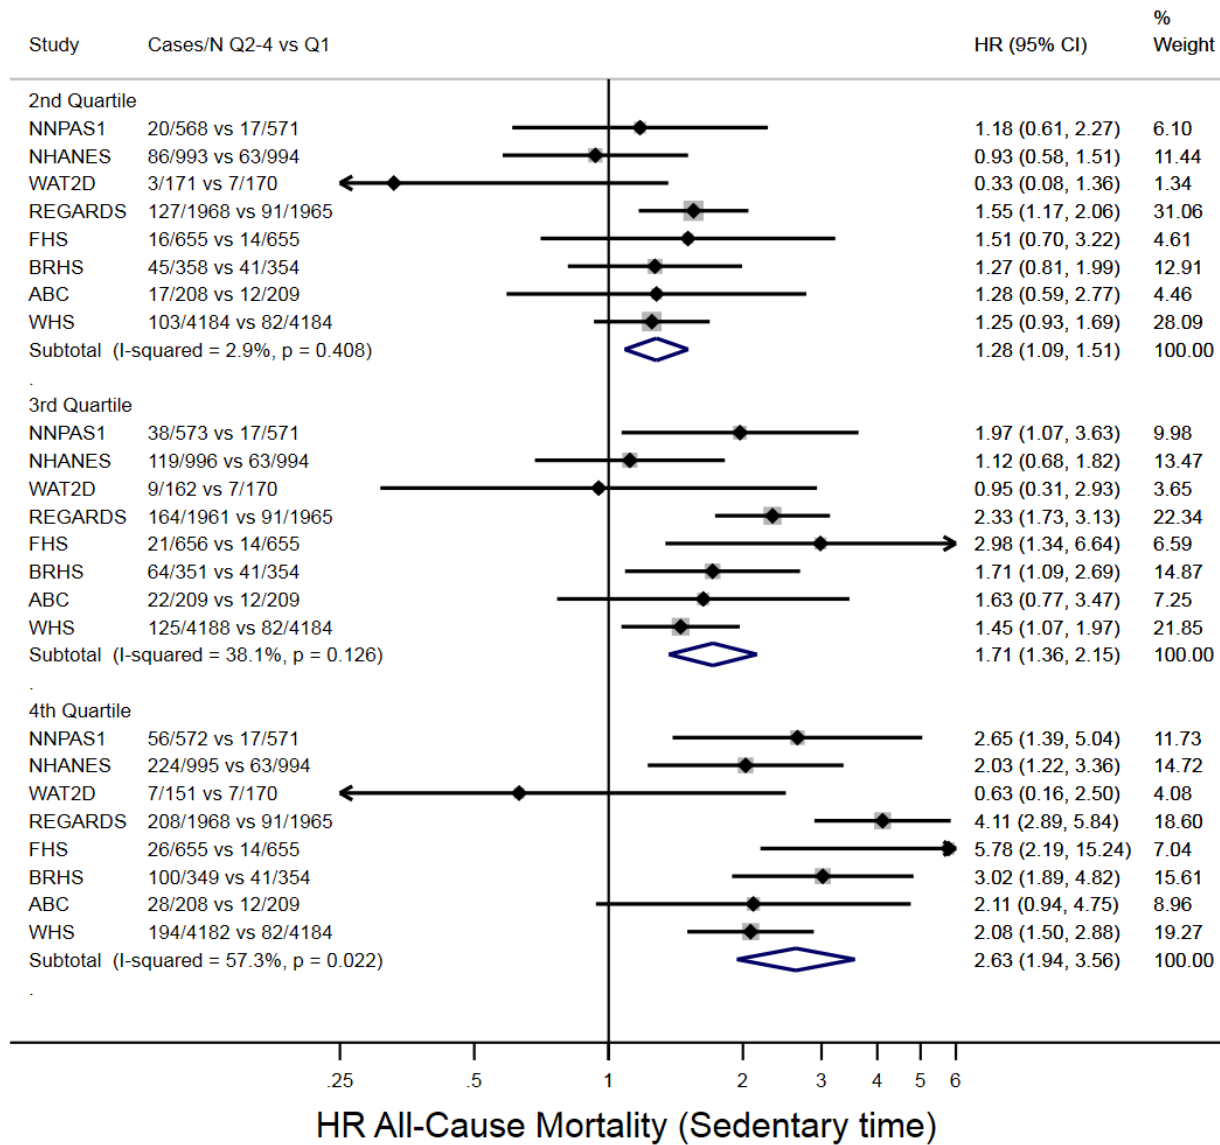

**Supplementary Figure 1.** Meta-analysis for the association between accelerometer measured total physical activity (CPM, **2a**), Light-intensity physical activity (LPA) (**2b**), low light-intensity physical activity (low LPA) (**2c**), high light-intensity physical activity (high LPA) (**2d**), moderate-to-vigorous intensity physical activity (MVPA) (**2e**) and sedentary time (**2f**) with all-cause mortality stratified by quartiles excluding the reference group (N=36383; 2149 deaths). Data are adjusted for age, sex, body mass index, socio-economic status and wear time. Moderate-to-vigorous intensity physical activity and sedentary time are mutually adjusted. %weight refers to each study's percentage weight to the overall effect size. (NNPAS1, Norwegian National Physical Activity Surveillance 1; NHANES, National Health and Nutrition Examination Survey; WAT2D, Walking Away from Type 2 Diabetes; REGARDS, The REasons for Geographic And Racial Differences in Stroke; FHS, Framingham Heart Study; BRHS, British Regional Heart Study; ABC, Attitude, Behaviour and Change; WHS, Women's Health Study).



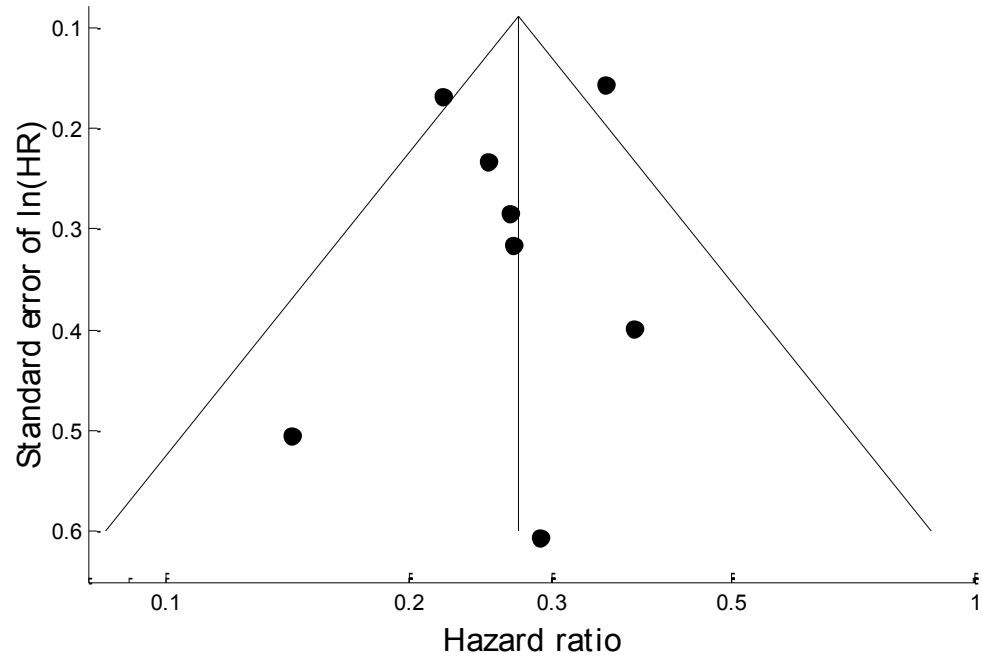

**Supplementary Figure 2.** Funnel plot for total physical activity (CPM) comparing quartile 1 and quartile 4. (Eggers test for funnel plot asymmetry;  $P=0.63$ )

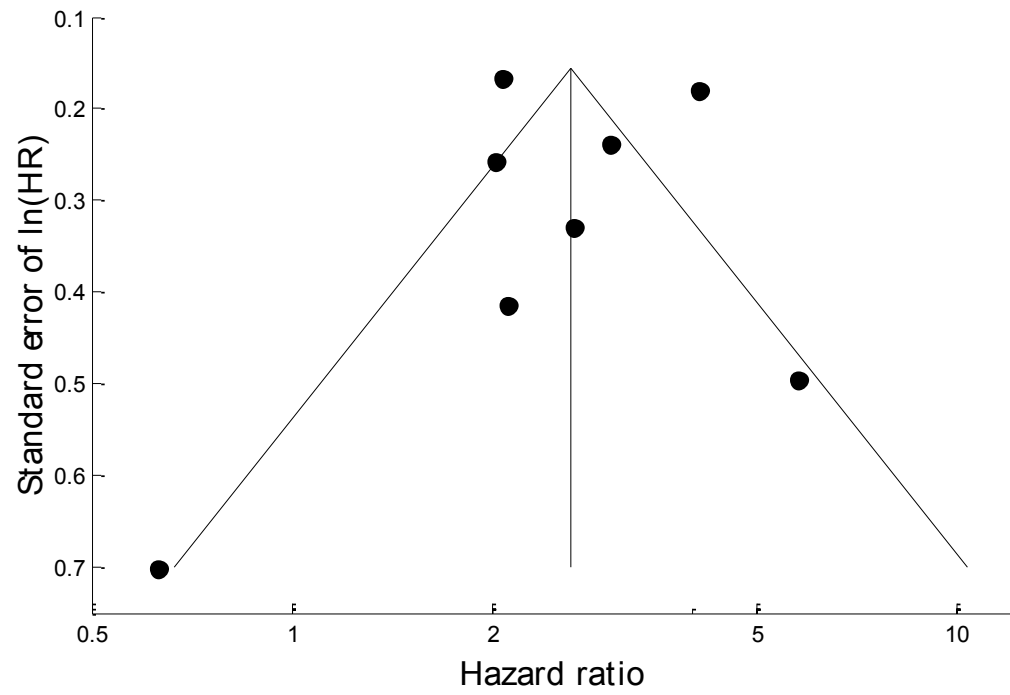

**Supplementary Figure 3.** Funnel plot for sedentary time comparing quartile 1 and quartile 4. (Eggers test for funnel plot asymmetry; P=0.59)
